# Supplementary material for: Long-term trends in total inorganic nitrogen and sulfur deposition in the U.S. from 1990 to 2010
Source: Copernicus journal article supplement (doi:10.5194/acp-2018-116), 2018-02-21
Supplement: Supplementary file [file acp-2018-116-AC2-supplement.pdf]

Response to review #2 on acp-2018-116

Long-term trends in total inorganic nitrogen and sulfur deposition in the U.S. from 1990 to 2010

Yuqiang Zhang, Rohit Mathur, Jesse O. Bash, Christian Hogrefe, Jia Xing, Shawn J. Roselle

We thank referee #2 for the positive comments and constructive suggestions, which have helped us improve the manuscript. Summarized below are our detailed response to the reviewer comments (shown in blue). All comments have been carefully addressed here (blue colors are for referee's comments), and we have tracked all changes in the revised manuscript.

This paper examines trends in inorganic nitrogen and sulfur deposition from 1999 to 2010 across the U.S. This analysis is performed using WRF-CMAQ model simulations. The results from the model are compared to data from the NADP (National Atmospheric Deposition Program) Network. The trends and spatial patterns observed are discussed. Overall, this is a good paper.

Response: We thank the reviewer for the overall positive assessment of our paper.

But I do have some concerns. I feel a large part of the methods section is missing as the authors do not actually discuss the dry deposition data being used.

**Response:** We thank the reviewer for raising this issue. The U.S. CASTNET (Clean Air Status and Trends Network) does provide an estimate of long-term trends of dry deposition data. However, these values are not measured but instead derived using the inferential method, pairing the measured air pollutants concentration with a modeled deposition velocity from the MLM model (Meyers et al, 1998). So rather than comparing two model values from CMAQ and MLM, we chose to compare CMAQ outputs to ambient concentrations of both gaseous ( $\text{SO}_2$ ) and particulate ( $\text{SO}_4^{2-}$ ,  $\text{TNO}_3^-$ ,  $\text{NH}_4^+$ ) species with measurements from the CASTNET. We have added descriptions of the observation dataset from CASTNET and evaluation into manuscript, as also detailed in our response to a similar query by Reviewer 1. Please see section 2.2 and section 3.1.

We have also addressed the reviewer's similar comments in the specific comments below.

References:

Meyers, T. P., Finkelstein, P., Clarke, J. and Ellestad, T. G.: A multilayer model for inferring dry deposition using standard meteorological measurements, J. Geophys. Res. Atmos., 103(D17), 22645–22661, 1998.

General Comments: -I am a bit surprised that the abbreviation TSOx is used for sulfur deposition rather than TS. TS to me seems more fitting, but I understand if the other is more traditionally used as I am not as familiar with that literature as I am with nitrogen deposition. However, that being said it seems that the paper goes back and forth using TSOx and  $\text{TSO}_4$  to represent sulfur deposition. This is true throughout the main text, figures, and supporting information. This should be checked.

**Response:** We thank the reviewer for pointing this out and agree that consistency is needed in the use of the abbreviation. We agree with the reviewer that TS is a better abbreviation since total

sulfur deposition (expressed in mass of S) is analyzed and compared between the model and observations. In the revised manuscript we have replaced “TSO<sub>x</sub>” and “TSO<sub>4</sub>” in all the text, figures and tables as well as in the supporting information, with the abbreviation “TS”.

**Specific Comments: Abstract Page 1, Line 12 – The abbreviation WRF-CMAQ is not defined.**

**Response:** In the revised manuscript, we have revised the text as:

“Here, we use long-term model simulations from the coupled Weather Research and Forecasting and the Community Multiscale Air Quality (WRF-CMAQ) model”

We also updated the sentence on line 16, Page 3:

“The long term simulations were previously performed using the coupled Weather Research and Forecasting and the Community Multiscale Air Quality (WRF-CMAQ model, Wong et al., 2012)”

**Page 1, Lines 15-17 – The authors mention that the model generally underestimates the wet deposition. But they do not provide any reasons why this is. This should be added to the abstract.**

**Response:** The underestimation of the wet deposition likely arises due to a combination of factors including coarse model grid resolution, missing emissions of lightning NO<sub>x</sub>, as well as the poor temporal and spatial representation of NH<sub>3</sub> emissions. Now we add the explanation in Page 1 line 17:

“The underestimation of the wet deposition by the model is mainly caused by the coarse model grid resolution, missing lightning NO<sub>x</sub> emissions, as well as the poor temporal and spatial representation of NH<sub>3</sub> emissions.”

**Page 1, Line 19 – Suggest changing decrease of TNO<sub>3</sub> to decreases in TNO<sub>3</sub>?**

**Response:** Following the reviewer’s suggestion, we have modified the sentence as:

“The decreasing trends of TIN TDEP are caused by decreases in TNO<sub>3</sub>”

**Page 1, Line 20 – The authors mention there are increasing trends in TIN deposition over the Tropical Wet Forest. This is the only region type listed in the text that does not have a geographic location included in its title. I think this makes it hard for readers to understand where it is. I would suggest adding a phrase such as southern Florida to aid the reader.**

**Response:** We thank the reviewer for pointing this out. We have incorporated the reviewer’s suggestions in Page 1 line 20:

“in the Tropical Wet Forests (Southern Florida Coastal Plain)”

**Page 1, Line 22 – Suggest removing the words region of before Eastern**

**Page 1, Line 23 – Suggest removing the words region of before Tropical**

**Response:** We followed the reviewer’s comments and removed the words “region of” for the sentence from line 22-line 24. Now the new sentence is:

“TIN DDEP shows significant decreasing trends in the Eastern Temperate Forests, Northern Forests, Mediterranean California and Marine West Coast Forest, and significant increasing trends in the Tropical Wet Forests, Great Plains and Southern Semi-arid Highlands”

Page 1, Line 28 – Suggest adding an a before combination.

**Response:** We made the change following the reviewer’s comments. The new sentence is: “TDEP of TIN over the U.S. was dominated by deposition of TNO<sub>3</sub> during the first decade, which then shifts to reduced nitrogen (NH<sub>x</sub>) dominance after 2003 resulting from a combination of NO<sub>x</sub> emission reductions and NH<sub>3</sub> emission increases.”

1.Introduction Page 2, Line 12 – Suggest changing twice higher than to twice as high as

**Response:** We made change following the reviewer’s comments. The new sentence is: “Another possible source of NH<sub>3</sub> emissions are from vehicles which may be twice as high as the emission estimates in the current NEI (Sun et al., 2016).”

Page 2, Line 13 – Suggest removing the the before sulfur.

Page 2, Line 14 – form fossil-fuel should be from fossil-fuel

**Response:** We removed word “the” in the sentence, and also corrected the word “form”. The new sentence is:

“The primary emission source for sulfur deposition is sulfur dioxide (SO<sub>2</sub>) which also mainly originates from fossil-fuel combustion (Smith et al., 2011)”

Page 2, Lines 15-20 – Here the authors discuss the wet deposition national networks.

But they do not actually tell how the measurements are made. I would suggest adding some text telling how the samples are collected and then measured by ion chromatography to provide the data.

**Response:** Following the reviewer’s suggestion in the revised manuscript we include a brief description of the NADP measurements in section 2.2 (Page 4 line 6):

“The deposition is measured by wet-only samples, which are triggered by precipitation. The deposition of sulfate and nitrate are analyzed by ion chromatography, and ammonium by flow injection analysis (<http://nadp.slh.wisc.edu/educ/sample.aspx>, accessed May 4, 2018).”

Page 2, Line 21 – Suggest adding the words e.g., before EEA. Also a comma is missing after EEA

Page 2, Line 22 – Suggest removing the comma and phrase to name a few after 2015

**Response:** We have incorporated the reviewer’s suggestion by modifying the sentence as:

“These data have been extensively used to quantify the sources, pattern, and temporal trends of WDEP of major species worldwide (e.g., EEA, 2011; Jia et al., 2014; Cheng and Zhang, 2017; Lajtha and Jones, 2013; Du et al., 2014; Sickles II and Shadwick, 2007a, 2007b, 2015).”

Page 3, Line 2 – There is an extra period after loss

**Response:** We thank the reviewer for catching the typo. The extra period has been removed in the revised text.

Page 3, Line 5 – Suggest removing the second Zhao et al.

**Response:** Actually, the first Zhao et al., 2009, and the second Zhao et al., 2015, 2017 are not the same first author, even though they share the same last name and initials. To made it clear, now we rewrite this:

“Zhao Y. et al., 2009; Zhao Y. H. et al., 2015, 2017”

Page 3, Line 8 – Suggest changing process to processes

**Response:** We made the change following the reviewer’s comments. The new sentence now is: “CTMs can link the sources to the deposition through atmospheric chemistry and transport processes”

2.Methods 2.1.Model setup Page 3, Line 16 – The abbreviation WRF-CMAQ is not defined

**Response:** We thank the reviewer for pointing this out. Now we add the abbreviation: “The long term simulations were previously performed using the coupled Weather Research and Forecasting and the Community Multiscale Air Quality (WRF-CMAQ model, Wong et al., 2012)”

Page 3, Line 20 – There is an extra comma after Gan et al. Also suggest adding an a before detailed

**Response:** We made the change following the reviewer’s comments. The new sentence now is: “Interested readers are referred to Gan et al. (2015, 2016) for a detailed description of the settings of the CMAQ model and physical configurations of the WRF model (Table S1).”

Page 3, Line 22 – The chemical abbreviation used are not defined

**Response:** In the revised manuscript we have added the chemical abbreviation as: “The performance of the coupled WRF-CMAQ model for major trace gases, aerosol species and meteorological variables such as ozone (O<sub>3</sub>), fine particulate matter (PM<sub>2.5</sub>) and aerosol optical depth at both the hemispheric and regional scale ...”

Page 3, Line 24 – Suggest changing was shown to has shown

**Response:** We have corrected this as: “and has shown skill in simulating the magnitudes and long-term trends of these variables.”

2.2.Wet deposition observations in the U.S. Page 4, Line 11 – Suggest changing observation data used for to observational data used for the

**Response:** We modified the sentence following the reviewer’s suggestion as: “The detailed site information and the number of years of observational data used for the model evaluation”

Page 4, Line 13 – Suggest changing combine WDEP to combines WDEP and with 0.984 to by 0.984

**Response:** We have incorporated the reviewer’s suggestion in the revised sentence as: “In pairing the observed and modeled TNO<sub>3</sub> WDEP values (which combines WDEP of NO<sub>3</sub><sup>-</sup> and HNO<sub>3</sub>), we multiply the model estimated HNO<sub>3</sub> WDEP by 0.984 to account for the transformation of HNO<sub>3</sub> to NO<sub>3</sub><sup>-</sup> in solution in the measurements”

Page 4, Line 15 – Suggest changing combine WDEP to combines WDEP and with 1.06 to by 1.06

**Response:** We have incorporated the reviewer’s suggestion in the revised sentence as: “In pairing the observed and modeled NH<sub>x</sub> WDEP values (which combines WDEP of NH<sub>4</sub><sup>+</sup> and NH<sub>3</sub>), we multiply the model estimated NH<sub>3</sub> WDEP by 1.06”

Page 4, Line 17 - Suggest changing combine WDEP to combines WDEP and with 1.50 to by 1.50

**Response:** We have incorporated the reviewer's suggestion in the revised sentence as: "In pairing the observed and modeled TSO<sub>x</sub> WDEP values (which combines WDEP of SO<sub>4</sub><sup>2-</sup> and SO<sub>2</sub>), we multiply the model estimated SO<sub>2</sub> WDEP by 1.50"

Page 4, Lines 2-26 – Why is there no section on dry deposition in the Methods section? The authors explicitly state in the introduction that there are no direct measurements of this, but that they are calculated at some sites. So then information on how they are calculated and what is used here should be provided to the reader so that they fully understand the analysis that is being performed.

**Response:** The reviewer raises an interesting point related to evaluation of dry deposition estimates. The U.S. CASTNET (Clean Air Status and Trends Network) did provide the dry deposition data. However, these values are not measured but instead derived using the inferential method, pairing the measured air pollutants concentration with a modeled deposition velocity from the MLM model (Meyers et al, 1998). So rather than comparing the two model values between CMAQ and MLM, we chose to compare CMAQ estimated ambient concentrations of both gaseous (SO<sub>2</sub>) and particulate (SO<sub>4</sub><sup>2-</sup>, TNO<sub>3</sub><sup>-</sup>, NH<sub>4</sub><sup>+</sup>) species with measurements from CASTNET. We change the title in section 2.2 "Wet deposition observations in the U.S." to "Deposition observations in the U.S.".

On Page 5 line 7, we add the description for the dry deposition from the U.S. CASTNET: "The U.S. CASTNET provides long-term observation of atmospheric concentrations as well as the dry deposition (<https://www.epa.gov/castnet>, accessed May 7, 2018). However, the dry deposition values reported are not directly measured, but estimated using the inferential method, pairing the measured air pollutant concentration with a modeled deposition velocity from the MLM model (Meyers et al, 1998). So rather than comparing dry deposition estimates from two models, we choose to evaluate the model's performance in simulating the ambient air concentrations (sulfur dioxide (SO<sub>2</sub>), sulfate (SO<sub>4</sub><sup>2-</sup>), total nitrate (TNO<sub>3</sub> = NO<sub>3</sub><sup>-</sup> + HNO<sub>3</sub>), and ammonium (NH<sub>4</sub>)). The detailed site information and the number of years of observational data used for the model evaluation can be found in supporting Table S3. We apply the same criteria in selecting valid observation sites as the NADP/NTN."

In the revised manuscript we further discuss the evaluation of these air concentrations on Page 6 line 21:

"To evaluate the model's performance in simulating the DDEP, we compare the model simulated concentration with the observations from CASTNET. Comparisons of annual average simulated concentrations with corresponding measurements at the CASTNET sites show strong correlation for SO<sub>2</sub> (R of 0.88), SO<sub>4</sub> (0.95), TNO<sub>3</sub> (0.94), and NH<sub>4</sub> (0.94). Some underestimation for SO<sub>4</sub>, and overestimation in other species ambient concentrations is noted (supporting Fig. S4). The model also captures the trends for these species with very high R, but the magnitude of the decreasing trends is underestimated by the model (supporting Fig. S5)."

Page 4, Lines 2-26 – The authors do not actually explain how the data from the network is collected. I understand the model analysis is the point of the paper. But since these

observational data are used to evaluate the model then the authors should provide at least some text to give the readers context.

**Response:** We have now included a brief description of the NADP measurement in Page 4 line 6: “The wet deposition is measured by wet-only samples, which are triggered by precipitation. The deposition of for sulfate, nitrate are analyzed by ion chromatography, and ammonium by flow injection analysis (<http://nadp.slh.wisc.edu/educ/sample.aspx>, accessed May 4, 2018).”

Page 5, Line 5 – There is an extra comma after equation 2

**Response:** We thank the reviewer for pointing this out. Now we removed the extra comma.

Page 3, Line 14 to Page 5, Line 6 – In the methods section there is no discussion of the trend analysis that is used throughout the paper. What is this analysis? How is it done? This should be added to the paper.

**Response:** Thanks the reviewer for pointing this out. We now added the descriptions how we performed the trends analysis in Page 4 line 26:

“For the trend analysis, we focus on the linear trends (Colette et al., 2011; Xing et al., 2015a), in which the linear least square fit method is employed, and significance of trends is examined with a Student t-test at the 95% confidence level ( $p=0.05$ )”

References:

Colette, A., Granier, C., Hodnebrog, Ø., Jakobs, H., Maurizi, A., Nyiri, A., Bessagnet, B., D’Angiola, A., D’Isidoro, M., Gauss, M., Meleux, F., Memmesheimer, M., Mieville, A., Rouil, L., Russo, F., Solberg, S., Stordal, F., and Tampieri, F.: Air quality trends in Europe over the past decade: a first multi-model assessment, *Atmos. Chem. Phys.*, 11, 11657–11678, doi:10.5194/acp-11-11657-2011, 2011.

Xing, J., Mathur, R., Pleim, J., Hogrefe, C., Gan, C.-M., Wong, D. C., Wei, C., Gilliam, R., and Pouliot, G.: Observations and modeling of air quality trends over 1990–2010 across the Northern Hemisphere: China, the United States and Europe, *Atmos. Chem. Phys.*, 15, 2723-2747, doi:10.5194/acp-15-2723-2015, 2015a.

### 3.Results 3.1.Model evaluation of WDEP

Page 5, Line 16 – Suggest changing increases for all the three to increase for all three. Also exhibit should be exhibited. Also suggest changing in east than that in west to in the east than the west

**Response:** We followed the reviewer’s comments, and have rewritten the sentence:

“After performing the precipitation adjustment, the NMB values increase for all three species (Table 1). The model exhibited better performance for WDEP in the east than the west”

Page 5, Line 17 – A period is missing after (Appel et al., 2011)

**Response:** We thank the reviewer for pointing this out and have corrected it in the revised manuscript.

Page 5, Line 19 – Suggest changing both observations and models to both the observations and model results

**Response:** We thank the reviewer for pointing this out. Now we have corrected this:

“as seen from both the observations and model results (Table 2)”

Page 5, Line 20 – Suggest adding a the before Tropical

**Response:** Now we added the word “the” before Tropical.

Page 6, Line 11 – I am not sure I understand the phrase but a slightly distinctions in trends for different ecoregions. Is it maybe but with slight distinctions in the trends for each ecoregion?

**Response:** We now rewrite the sentence as the reviewer suggested:

“and the model is also able to capture these very well but a slightly distinctions in the trends for each ecoregion”

Page 6, Lines 11-13 – The authors mentions that the model generally underestimates decreasing WDEP trends for all sites, but for NH<sub>x</sub> they see increasing WDEP trends. Why is this? The authors need to tell why they think this might be the case for the model.

**Response:** The magnitude of the decreasing trends in TNO<sub>3</sub> and TS wet deposition are slightly underestimated by the model and result from both the coarse model grid resolution and uncertainties in the emission inventories. We have add this in Page 6 line 12:

“We see that the model generally underestimates the magnitude of the decreasing WDEP trends at many sites for TNO<sub>3</sub> and TS (Tables 2 and 4), which may be caused by the coarse model grid resolution (36km), and uncertainties in the emission inventories.”

Page 6, Line 14 – Suggest removing the word results before model

**Response:** We removed the repeat “results” as suggested:

“our model results indicate larger bias”

Page 6, Line 15 – Suggest changing increases for all the three to increase for all three. Also why are the authors only looking at the data from 2002-2006 when they discuss the NMB increase observed? This needs to be clarified.

**Response:** We now modified the sentence based on the reviewer’s comments:

“The NMB increase for all three species in our results from 2002 to 2006”

The reason why we looked at the data from 2002-2006 only as Appel et al. (2011) only has the simulations from 2002 to 2006. Here we want to compare the performance between the model runs using a newer version of the CMAQ model which was used in our study, with older version of the CMAQ from previous study.

Page 6, Line 18 – Suggest changing are more to have more

Page 6, Line 19 – Suggest changing challenging to challenges

**Response:** We made the changes following the reviewer’s these two comments:

“coarse resolution models (e.g. 36km in our study) have more challenges to simulate”

Page 5, Line 8 to Page 6, Line 20 – Why is there no matching section on the model evaluation for DDEP? The remainder of the results section discusses the trends in total, wet, and dry deposition so it seems that it should be established how the model compares with the calculated dry deposition values provided by NADP.

**Response:** We thank the reviewer for pointing this out. Please see our reply above for the similar question.

3.2.Spatial patterns of modelled total deposition of nitrogen and sulfur Page 6, Line 21 – modelled should be written as modeled to be consistent with how it is used throughout the rest of the text

**Response:** We thank the reviewer for pointing this out. We now kept consistent with the words we used, and made the following changes:

Page 6 line 21: “Spatial patterns of modeled total deposition of nitrogen and sulfur”

Page 5 line 2-3: “account for biases in modeled precipitation by adjusting the modeled WDEP”

Page 7, Line 18 – Suggest removing the and after showed

Page 7, Line 19 – Believe that Table 4 should be Table 6

**Response:** We reply the reviewers’ above two comments together. We now removed the word “and” after the word “showed”, and change “Table 4” to “Table 6”. The new sentence is: “which showed insignificant decreasing trend (Table 6)”.

3.3.Wet versus dry nitrogen and sulfur deposition trends in the U.S.

Page 7, Line 25 –Suggest adding a the before Eastern

Page 7, Line 26 – Suggest adding a the before Northern and Great

**Response:** We thank the reviewer for pointing this out. We reply the reviewers’ above two comments together. Now we have add the word “the” as the reviewer suggested:

“The most significant decreasing region is the Eastern Temperate Forests, with an annual decrease of  $-0.070 \text{ kg N ha}^{-1} \text{ yr}^{-1}$ , followed by the Northern Forests ( $-0.037 \text{ kg N ha}^{-1} \text{ yr}^{-1}$ ) and the Great Plains ( $-0.023 \text{ kg N ha}^{-1} \text{ yr}^{-1}$ )”

Page 7, Line 27 – Suggest changing was mainly to were mainly

**Response:** We thank the reviewer for pointing this out. Now we have corrected this.

“The decreasing trends of TIN WDEP were mainly caused”

Page 7, Line 28 – The authors mention that there are no significant changes for WDEP of NH<sub>x</sub>. However, in Table S4 the values for Tropical Wet Forests are in bold, which is what indicates a significant trend. Also there is light blue being shown in Figure S4b. This needs to be clarified.

**Response:** We thank the reviewer for pointing this out. There are actually no significant trends for WDEP of NH<sub>x</sub> in the majority of U.S. Now we have rewrote this sentence:

“There are no significant changes for WDEP of NH<sub>x</sub> in the majority of U.S. except for the region Tropical Wet Forests (supporting Fig. S4b),”

Page 8, Line 8 – Suggest adding an a before distinct and changing value to values

**Response:** We have made the changes following the reviewer’s comments:

“Fig. 7 shows a distinct spatial distribution for both the WDEP and DDEP of sulfur, with much higher values in the eastern U.S.”

Page 8, Line 9 – Suggest adding a the before vicinity and changing source to sources

**Response:** We have made the changes following the reviewer’s comments:

“in the vicinity and downwind of major sources”

3.4.Deposition budget in U.S.

Page 8, Line 18 – Suggest changing were estimated to was estimated



**Response:** We modified the sentence following the reviewer's comment:  
"The TNO<sub>3</sub> WDEP was estimated to decrease"

Page 8, Line 19 – Suggest removing the hyphen after 2010

**Response:** We removed the hyphen as suggested.

Page 8, Line 21 – Suggest changing changes to changed

**Response:** Changed as suggested:

Page 8, Line 22 – Suggest changing till to until and removing the the before NH<sub>x</sub>

**Response:** We thank the reviewer for pointing this out. Now we have modified the sentence:  
"TNO<sub>3</sub> deposition dominates TIN TDEP until the early 2000s. After 2003, however, NH<sub>x</sub> dominates the TIN TDEP over the U.S."

Page 8, Line 26 – Suggest changing 1999-2010 to 1999 to 2010

**Response:** We have changed "1990-2010" to "1990 to 2010":

Page 8, Line 27 – Suggest changing emission to emissions

**Response:** We made the change following the reviewer's comment:  
"due to regulations and growth in NH<sub>3</sub> emissions"

Page 8, Line 28 – The reference is written in blue

**Response:** We have reformatted the reference.

Page 9, Line 2 - The references are written in blue

**Response:** We have reformatted the reference.

Page 9, Lines 1-5 – I believe that this section is in reference to Figure 8, but there is citation to Figure 8 listed here.

**Response:** We now add the reference to Figure 8 in the Page 9 line 1:  
"Similar to TIN TDEP, the TSO<sub>x</sub> TDEP has also decreased, from 6.85 kg S ha<sup>-1</sup> yr<sup>-1</sup> in 1990 to 3.26 kg S ha<sup>-1</sup> yr<sup>-1</sup> in 2010 (Fig. 8 (b)),"

Conclusions Page 9, Line 10 – Suggest changing observation to observations

**Response:** We made the change as suggested.

Page 9, Line 25 – Suggest adding a the before Eastern

**Response:** We add the word "the" as suggested.

Page 10, Line 9 – It should be aerosol-phase

**Response:** We change the word "aerosol phase" to "aerosol-phase".

Data availability Page 10, Line 18 – Suggest changing shared to obtained

**Response:** We changed the word "shared" to "obtained" as the reviewer suggested.

Competing interests Page 10, Line 21 – Suggest changing conflict to conflicts

**Response:** We changed “no conflict of interest” to “no conflicts of interest”.

Page 10, Line 26 – Suggest adding a the before U.S. and removing the phrase improvements of after suggestions on the

**Response:** We made the changes following the reviewer’s comments, and the new sentence is: “We greatly acknowledge James Kelly and Kristen Foley from the U.S. EPA for their comments and suggestions on the initial version of this manuscript.”

Disclaimer Page 10, Line 28 – Suggest changing view to views

**Response:** We changed the word “view” to “views”.

References Page 11, Line 26 – Believe the accent marks in Muller should be over the u

**Response:** Now we changed to “Müller” as the reviewer suggested.

Tables and Figures

Table 1 -In first line of caption – Suggest changing for all the annual to for the sum of the annual -In second line of caption - Suggest adding a the before model -What is the difference between R and R for trends? There is no discussion about this in the main text so it is hard to understand why the two set of values are being shown.

**Response:** We have modified the sentence following the reviewer’s comments and also explain what the second R means. The “R for the trends” are the correlation coefficient for the 21-yr changes of the wet deposition ( $\text{TNO}_3$ ,  $\text{NH}_x$  and  $\text{TSO}_x$ ) between the model and the observations Now the new caption is:

“Correlation coefficient (R), mean bias (MB,  $\text{kg ha}^{-1}$ ), and normalized mean bias (NMB, %) for the sum of the annual accumulated wet deposition (WDEP) between the model and NADP sites from 1990 to 2010, including both the model values with and without applying monthly/annual precipitation adjustment. The R for trends are the correlation coefficient for the 21-yr changes of the wet deposition ( $\text{TNO}_3$ ,  $\text{NH}_x$  and TS) between the model and the observations.”

Table 2 -In first line of caption – Suggest adding a the before 10 -In third line of caption – There should be a hyphen in t-test -Second column heading – Suggest changing Regions to Region -Third column heading – Suggest changing # sites to # of sites

**Response:** We changed the caption as the reviewer’s suggested, and also made the changes to the Table. Please see our new draft.

Table 3 -Second column heading – Suggest changing Regions to Region -Third column heading – Suggest changing # sites to # of sites

Table 4 -Second column heading – Suggest changing Regions to Region -Third column heading – Suggest changing # sites to # of sites

Table 5 -Second column heading – Suggest changing Regions to Region

Table 6 -In third line of caption – There should be a hyphen in t-test -Second column heading – Suggest changing Regions to Region

**Response:** We answer the reviewers’ above comments about Table 3 to Table 6 together. As suggested, we have made the changes in the tables’ captions. Please see our new draft.

Figure 1 -In second line of caption – To match the figure between observations and precipitation-adjusted model results should be switched -In third line of caption – Suggest changing Each NADP to The data at each NADP site -Letters should be added to each plot and the caption updated to indicate this -Suggest making a symbol indicating that green is for East sites and red is for West sites as currently this is only indicated from the small text at the top of each plot -It should be indicated in the caption what the solid and dashed lines in each plot represent -There are no subscripts in the abbreviations used on both the x and y-axes for all plots

**Response:** Following the review’s comments, we have made the following changes. The new captions reads as:

“Scatter plots for the annual accumulated WDEP (total oxidized nitrogen (TNO<sub>3</sub>, a), reduced nitrogen (NH<sub>x</sub>, b), and total sulfate (TS, c)) between precipitation-adjusted model results and observations from 1990 to 2010 for 170 valid sites with 3531 valid data points. The data at each NADP is assumed to be valid for our analysis only if at least 18 years of observation data are available at that site and the data coverage is at least 75% for each year. Each point in the plots represents the annual accumulated WDEP for a given site and year. Note that the annual accumulated WDEP values used in this analysis may not be the actual annual totals due to missing data in the observations. The green color is for the eastern U.S., and the red color is for the western U.S., with the dashed line for the 1:2 and 2:1 ratio, and the solid line for the 1:1 ratio.”

We also add subscripts for abbreviations at both the x, y-axes of all the plots. Please see our updated figures.

Figure 2 -In first line of caption – Suggest changing of (a) TNO3 to for (a) TNO3 - In second line of caption – Suggest removing the phrase annual accumulated before precipitation. -In second, third, and fourth lines of caption - US should be U.S. -There are no x-axis labels -The legend for plots a, b, and c are incorrect as they indicate the data for the East is red and West is green

**Response:** We have corrected the legends for plots a, b, and c. Please see our updated draft.

Figure 3 -In first line of caption – Suggest changing adding a the before observations -In first line of caption – To match the figure between observations and precipitationadjusted model valves should be switched -In second line of caption – Suggest changing observation to observational -Letters should be added to each plot and the caption updated to indicate this -It should be indicated in the caption what the solid and dashed lines in each plot represent -There are also no subscripts in the abbreviations used on both the x and y-axes for all plots

**Response:** We have made the changes to the captions, and also added the letters for the plots. Please see the new plots from our updated draft.

The new caption is:

“Figure 3. Comparison of the WDEP trend for each valid site between the precipitation-adjusted model values and observational for total oxidized nitrogen (TNO<sub>3</sub>, a), reduced nitrogen (NH<sub>x</sub>, b), and total sulfate (TS, c). Each NADP site is assumed to be valid for our analysis only if at least 18 years of observation data are available at that site and the data coverage is at least 75% for

each year. The green color is for the eastern U.S., and the red color is for the western U.S., with the dashed line for the 1:2 and 2:1 ratio, and the solid line for the 1:1 ratio. ”

Figure 4 -In first and second lines of caption – Suggest changing panel to panels -In third line of caption – Suggest changing plot show p value to plots show p values -In fourth line of caption – Suggest adding a comma after i.e. -There are no x and y-axes labels

**Response:** We have made changes to the captions according to the reviewer’ comments.

Figure 5 -In second line of caption – Suggest changing the right plot show p value great than to both plots show p values greater than -In third line of caption – T-test should be t-test. Also suggest adding a comma after i.e. -Letters should be added to each plot and the caption updated to indicate this -There are no x and y-axes labels

Figure 6 -In first line of caption – Suggest changing (top panel) and DEP (bottom panel) to (top panels) and DDEP (bottom panels) -In second line of caption – Suggest changing plot show p value great than to plots show p values greater than -In third line of caption – T-test should be t-test. Also suggest adding a comma after i.e. -There are no x and y-axes labels

**Response:** We have now corrected this. Please see our updated draft for the new plots.

Figure 8 -In caption – It should be mentioned in the caption that the percent contribution is being indicated on each bar -In first line of caption – US should be U.S. -On the yaxis for both plots, US should be U.S. -Suggest in legend for plot a calling Oxid as NO<sub>3</sub> instead and Red as NH<sub>x</sub> instead so that it matches the main text

**Response:** We now mention the percentiles in the caption, and also updated our plots.

“Interannual variability of the TDEP for inorganic nitrogen (a), and sulfur (b) in the U.S. from 1990 to 2010, including their fractions labelled as percent contributions for WDEP of oxidized nitrogen (NO<sub>3</sub>), WDEP of reduced nitrogen (NH<sub>x</sub>), DDEP of oxidized nitrogen (NO<sub>3</sub>) and DDEP of reduced nitrogen (NH<sub>x</sub>) deposition for the nitrogen, and WDEP versus DDEP for sulfur. ”

Figure 9 -In second line of caption – Suggest changing an NH<sub>x</sub> to a NH<sub>x</sub> -In third line of caption – Suggest removing the comma after 0.5 -There are no x and y-axes labels -Title for plot a – Suggest changing NH<sub>x</sub> ratio over TIN 1990 to TDEP NH<sub>x</sub> to TIN ratio 1990 -Title for plot b – Suggest changing NH<sub>x</sub> ratio over TIN 2010 to TDEP NH<sub>x</sub> to TIN ratio 2010 -Title for plot c – I am not sure I understand this plot title. What is (/year) indicating? Should the title maybe be TDEP NH<sub>x</sub> to TIN ratio Overall Trend?

**Response:** We have made the changes suggested by the reviewer in the revised manuscript. Please see our new draft for the updated plots.

Supporting Information Figure S1 -In caption – Suggest changing all the ofs to equal signs (e.g., 5 of Northern Forests to 5 = Northern Forests) -There are no x and y-axes labels -In plot title – US should be U.S. Also what does mask mean? It is not indicated in the caption or text.

**Response:** We have made the changes following the reviewer’s comments, and also update the plot caption as “U.S. ecoregion Level 1”. Please see the plot in our updated draft.

The new caption is:

“The 10 Level I ecoregions in the continental U.S.: 5 = Northern Forests, 6 = Northwestern Forested Mountains, 7 = Marine West Coast Forest, 8 = Eastern Temperate Forests, 9 = Great Plains, 10 = North American Deserts, 11 = Mediterranean California, 12 = Southern Semi-arid Highlands, 13 = Temperate Sierras, and 15 = Tropical Wet Forests.”

Figure S2 -In first line of caption – Suggest changing plot to plots. Also the words observation and model should be switched to match what is actually plotted. -In second line of caption – Suggest changing data. The site in NADP is assumed to data points. The data at each NADP site is assumed -In third line of caption – Suggest changing valid if only at to valid only if at, changing is available to are available, and changing for the to for that -In fourth line of caption – suggest changing plot to plots -In fifth line of caption – Suggest removing the the before missing -In sixth line of caption – Suggest changing observation to observations -It should be indicated in the caption what the solid lines in the plot represent. Also should this be like the other plots and have two dashed lines and one solid line?

**Response:** We made the changes following the reviewer’s comments.

Figure S3 -Letters should be added to each plot and the caption updated to indicate this -Suggest making a symbol indicating that green is for East sites and red is for West sites as currently this is only indicated from the small text at the top of each plot -It should be indicated in the caption what the solid and dashed lines in each plot represent -There are no subscripts in the abbreviations used on both the x and y-axes for all plots

**Response:** We add letters for each plot, and update the captions to indicate this. We also add descriptions for the two dashed and solid lines. The new captions is:

“Scatter plots for the annual accumulated deposition (total oxidized nitrogen (TNO<sub>3</sub>, a), reduced nitrogen (NH<sub>x</sub>, b), and total sulfate (TS,c)) without considering the precipitation adjustment between observation and model results from 1990 to 2010 for 170 valid sites with 3531 valid data. The site in NADP is assumed valid if only at least 18 years of observation data is available with 75% annual coverage for the site. Note that the annual accumulated deposition may not be the actual annual totals because of the missing data in the observation. The green color is for the eastern U.S., and the red color is for the western U.S., with the dashed line for the 1:2 and 2:1 ratio, and the solid line for the 1:1 ratio.”

Figure S4 -There are no x and y-axes labels -There are no subscripts in the abbreviations used in the titles for all plots

**Response:** We now add the subscripts for all the abbreviations. Please see the new plots in our updated draft.

Figure S5 -In first line of caption – Suggest adding a the before US. Also US should be U.S. -There are no x-axis labels -Suggest changing y-axis labels to Fraction of the Total -Suggest pointing out on both plots somehow 2003 since this is an important year in terms of trends and so that it corresponds with the discussion in the main text. Maybe add a vertical dashed line.

**Response:** We add a red arrow to point the year 2003, and description in the caption. “The red arrow points to the year 2003.”

Table S1 -Either the comma or the parenthesis should be removed from Xing et al. reference. Both are not needed.

**Response:** We removed the comma for both the Xing et al. (2013) and Xing et al. (2015a).

Table S3 -In third line of caption – Suggest removing the and with at the end of the sentence

**Response:** We removed the “and with” as suggested. Please see our new draft.

Table S4 -In fourth line of caption - There should be a hyphen in t-test -Second column heading – Suggest changing Regions to Region

**Response:** We made the changes as the reviewer suggested. Please see our new draft.

Table S5 -Second column heading – Suggest changing Regions to Region

**Response:** We made the change as the reviewer suggested. Please see our new draft.
